# Supplementary material for: Facile synthesis of Fe3S4hollow spheres with high-performance for lithium-ion batteries and water treatment
Source: Royal Society of Chemistry journal article supplement (doi:10.1039/c4ta05148c), 2014-10-09
Supplement: c4ta05148c1.pdf [file c4ta05148c1.pdf]

Electronic supplementary information

## Facile synthesis of $\text{Fe}_3\text{S}_4$ hollow spheres with high-performance for lithium-ion batteries and water treatment

Jun Zheng,<sup>†\*a</sup> Yong Cao,<sup>‡b</sup> Chao Cheng,<sup>a</sup> Cheng Chen,<sup>a</sup> Rui-Wen Yan,<sup>a</sup> Hai-Xia Huai,<sup>a</sup>  
Quan-Feng Dong,<sup>b</sup> Ming-Sen Zheng<sup>\*b</sup> and Chun-Chang Wang<sup>\*c</sup>

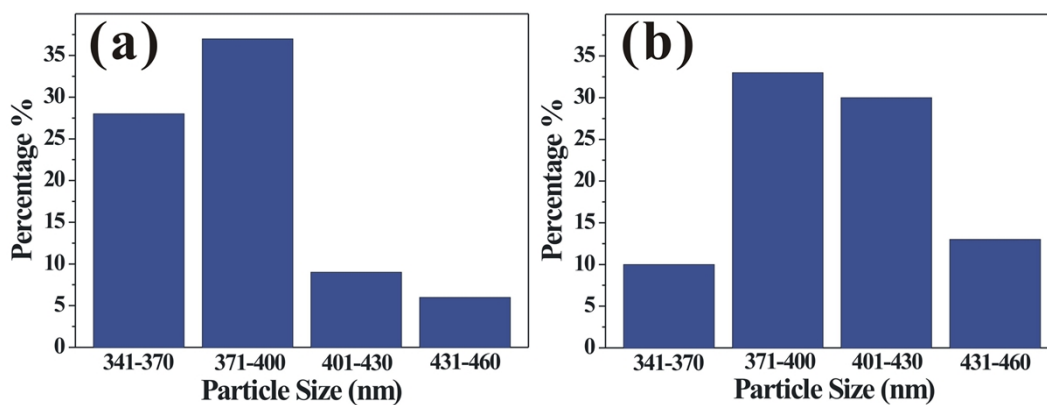

Fig. S1 Diameter size distribution histogram of (a) precursor  $\text{Fe}_3\text{O}_4$  spheres and (b)  $\text{Fe}_3\text{S}_4$  hollow spheres.

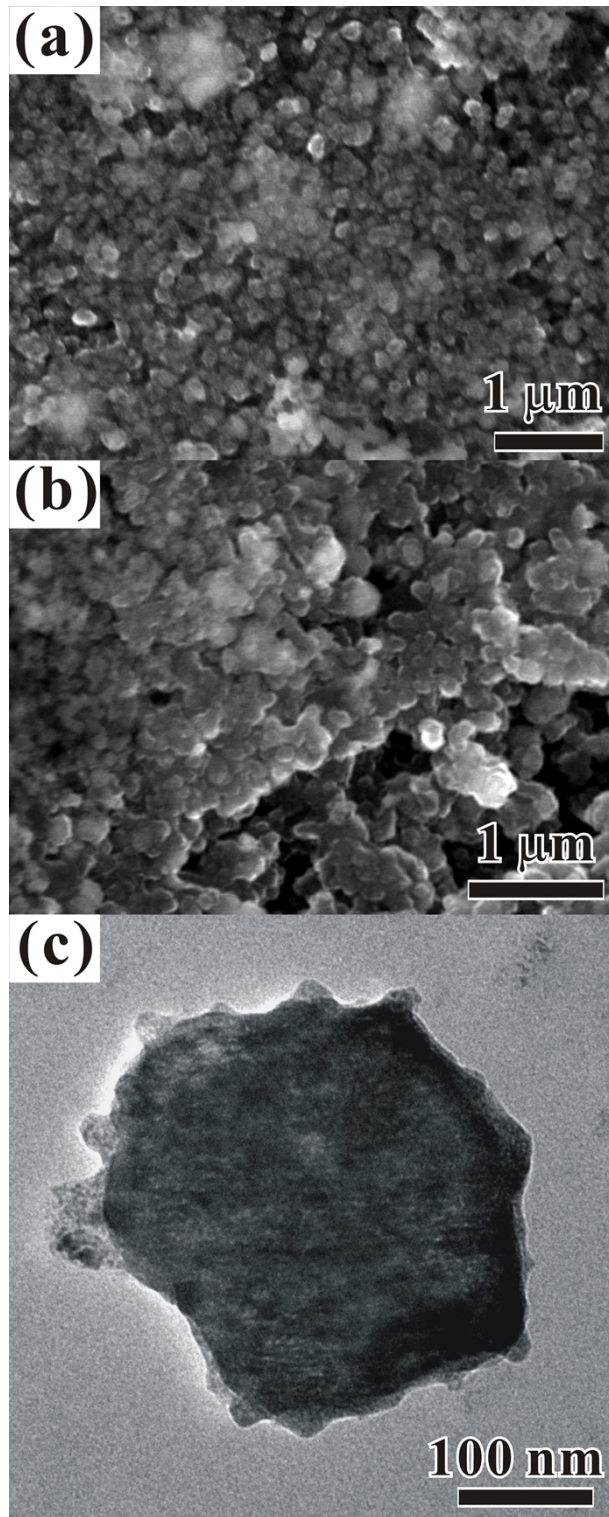

**Fig. S2** (a) SEM image of the Fe<sub>3</sub>S<sub>4</sub> electrodes after 10 cycles; (b-c) SEM and TEM images of the Fe<sub>3</sub>S<sub>4</sub> electrodes after 50 cycles.
